# Supplementary material for: Electrochemical paraquat sensor based on lead oxide nanoparticles
Source: Royal Society of Chemistry journal article supplement (doi:10.1039/d2ra02034c), 2022-01-01
Supplement: d2ra02034c1.pdf [file d2ra02034c1.pdf]

**Supporting Information**

**Electrochemical paraquat sensor based on lead oxide nanoparticles**

Pranlekha Traiwatcharanon<sup>1</sup>, Wilai Siriwatcharapiboon<sup>2</sup>, Oratai Jongprateep<sup>3</sup>,

Chatchawal Wongchoosuk<sup>1,\*</sup>

<sup>1</sup>Department of Physics, Faculty of Science, Kasetsart University, Bangkok 10900, Thailand.

<sup>2</sup>Department of Chemistry and Center of Excellence for Innovation in Chemistry, Faculty of Science, Kasetsart University, Bangkok, 10900, Thailand.

<sup>3</sup>Department of Materials Engineering, Faculty of Engineering, Kasetsart University, Bangkok 10900, Thailand.

\*Corresponding author. Tel.: +662-562-5555; Fax: +662-942-8029.

E-mail: [chatchawal.w@ku.ac.th](mailto:chatchawal.w@ku.ac.th) (Chatchawal Wongchoosuk)

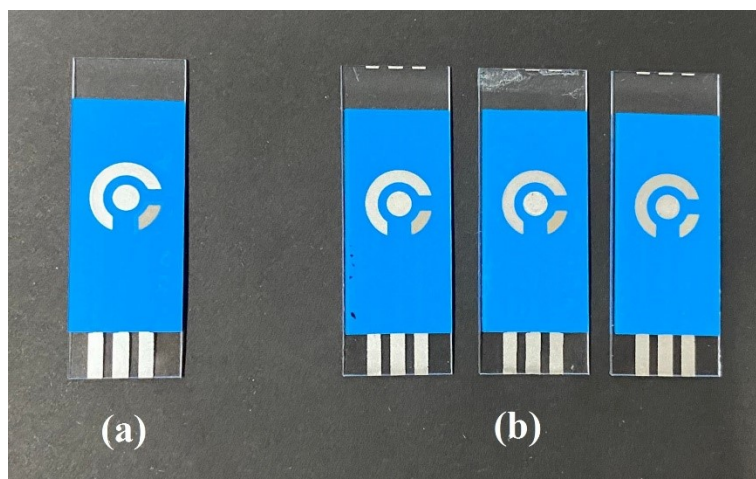

**Figure S1:** Photograph of real sensors before and after drop-casting PbO-NPs on working electrodes.

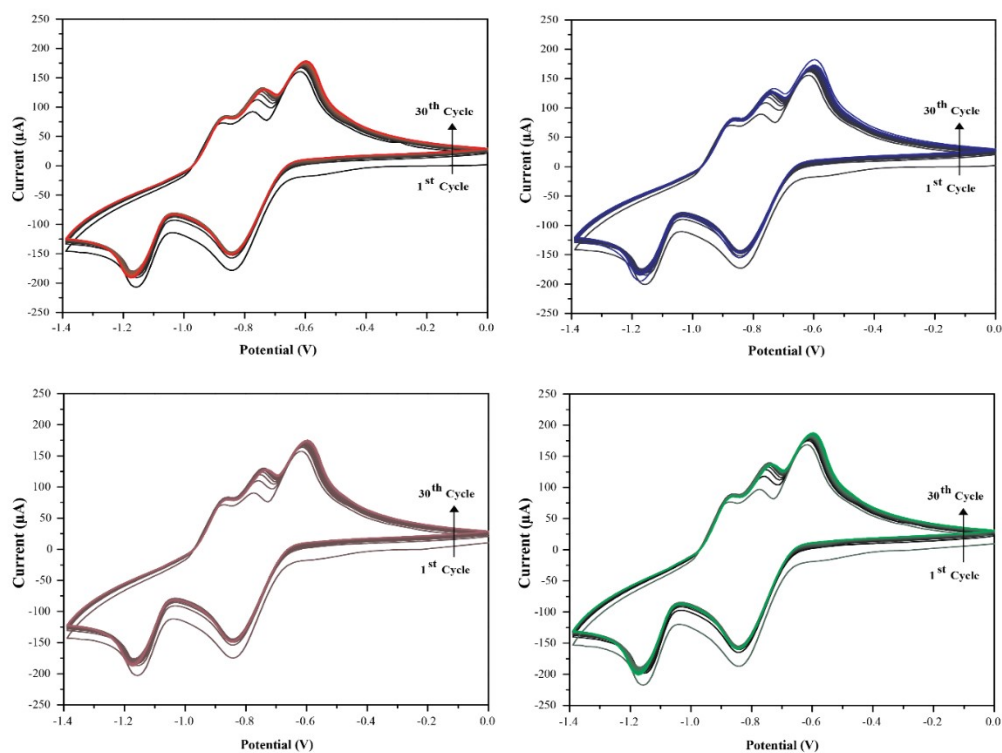

**Figure S2:** Cyclic voltammety responses of four independent fabricated PbO-NPs SPE sensors in presence of 10 mM paraquat as a function of the number of cycles.

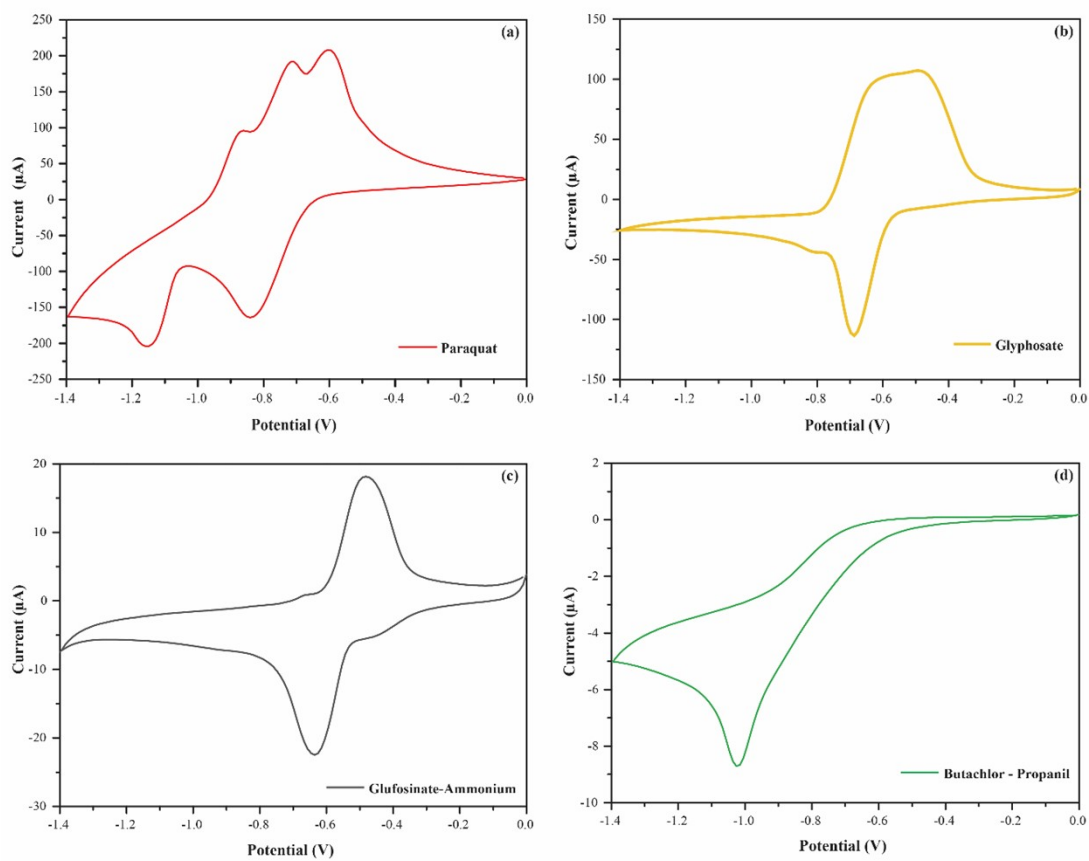

**Figure S3:** Cyclic voltammety responses of PbO-NPs SPE sensors in presence of various popular herbicides (10 mM).
